# Supplementary material for: The PTBP1‑NCOA4 axis promotes ferroptosis in liver cancer cells
Source: PubMed Central journal article supplement — Oncol Rep. 2023 Jan 13;49(2):45. doi: 10.3892/or.2023.8482 (PMC9868890; doi:10.3892/or.2023.8482), 2023-01-13
Supplement: Supplementary_Data.pdf [file Supplementary_Data.pdf]

Table SI. Sequences of siRNAs and shRNAs.

| siRNA or shRNA |           | Sequences                   |
|----------------|-----------|-----------------------------|
| si-PTBP1       | Sense     | 5'-GCACAGUGUUGAAGAUCAUTT-3' |
|                | Antisense | 5'-AUGAUCUUCAACACUGUGCTT-3' |
| si-NC          | Sense     | 5'-UUCUCCGAACGUGUCACGUTT-3' |
|                | Antisense | 5'-ACGUGACACGUUCGGAGAATT-3' |
| sh-PTBP1       | Sense     | 5'-GCACAGUGUUGAAGAUCAUTT-3' |
|                | Antisense | 5'-AUGAUCUUCAACACUGUGCTT-3' |
| sh-NC          | Sense     | 5'-UUCUCCGAACGUGUCACGUTT-3' |
|                | Antisense | 5'-ACGUGACACGUUCGGAGAATT-3' |

siRNA or si-, small interfering RNA; shRNA or sh-, short hairpin RNA; PTBP1, polypyrimidine tract-binding protein 1.

Table SII. Primer sequences of reverse transcription-quantitative PCR.

| Target gene | Primer (5'→3')               |                               |
|-------------|------------------------------|-------------------------------|
| ATG7        | F: ACGGTGTGCAGAGTCCACAA      | R: ACCAGAGGCTCACGACGATG       |
| NCOA4       | F: GCCGTCACCTGGAATGTCTTAGAAG | R: GCCTGCTGTTGAAGTGTCTCCTC    |
| GAPDH       | F: CAGAACATCATCCCTGCCTCTAC   | R: ATGAAGTCAGAGGAGACCACCTG    |
| PTBP1       | F: TCTACTTGTGTCTACTAACGGAC   | R: TGAACCTTGTCTGTCATTTCC      |
| STEAP3      | F: AGGTCACTTTTGTGGCTGTGTTCC  | R: GCTGAAGGTGCTCTTGCTCTGTAG   |
| GPX4        | F: CCGCTGTGGAAGTGGATGAAGATC  | R: CTTGTTCGATGAGGAACTGTGGAGAG |
| FTH1        | F: CCATCAACCGCCAGATCAACCTG   | R: GTTTCTCAGCATGTTCCCTCTCCTC  |
| SLC3A2      | F: GCTGGAACGCCTGAAACTGGAG    | R: TGGGAAGGAAAGGAGAAGGGTAGTG  |
| SAT1        | F: CTCCGGAAGGACACAGCATT      | R: AACATGCAACAACGCCACTG       |
| PCBP2       | F: GATCTGCGTGGTCATGTTGGAGTC  | R: AATCTGGCTGTGGAATGGCATACTG  |
| LPCAT3      | F: AAAGGGCAAGGCAAAGTGGGATG   | R: GCGTGGTGTGTTGATGTTGAATGAG  |
| ATG5        | F: TCATCCCACAGCCAACAGATTGAAG | R: TGCCTCCACCAAACCTGATTGAAG   |
| SLC7A11     | F: ACGGTGGTGTGTTTGTCTGTCTC   | R: GCTGGTAGAGGAGTGTGCTTGC     |
| TFRC        | F: GCTGGAGACTTTGGATCGGTTGG   | R: TATAACAACAGTGGGCTGGCAGAAAC |
| ACSL4       | F: CCAAGTAGACCAACGCCTTCAGAC  | R: TCGGTCCCAGTCCAGGTATTCTTTC  |
| SLC39A8     | F: ATTGCCTGGATGATAACGCTCTGC  | R: ACTGAGTCCCTGAAGGAGAGACAAG  |
| SLC39A14    | F: AGGAGAATGAGCAGACGGAGGAG   | R: GGAGGGAGCAGAGGGAGATGAC     |
| SLC11A2     | F: AGTGGCTGGATTTAAGTTGCTCTGG | R: TGACTCGTGGGACCTTGGGATAC    |
| GCLC        | F: GCTGGGAGGAAACCAAGCG       | R: GCGTGGTAGATGTGCAGGAAC      |

F, forward; R, reverse.

Table SIII. Candidate molecules in the ferroptosis pathway.

|         |          |        |         |         |
|---------|----------|--------|---------|---------|
| SLC3A2  | SLC7A11  | GCLC   | GCLM    | GSS     |
| GPX4    | ALOX15   | LPCAT3 | ACSL4   | TP53    |
| SAT1    | TF       | TFRC   | STEAP3  | SLC11A2 |
| SLC39A8 | SLC39A14 | PCBP2  | SLC40A1 | CP      |
| PCBP1   | FTH1     | FTL    | MAP1LC  | ATG5    |
| ATG7    | NCOA4    | PRNP   | HMOX1   | VDAC2   |
| VDAC3   | NOX2     | FTMT   |         |         |
